# Supplementary material for: Coordination and supramolecular assemblies of K+/Ln3+ to perhydroxycucurbit[5]uril in the presence of [PMo12O40]3−: potential application in isolation of light lanthanides
Source: Royal Society of Chemistry journal article supplement (doi:10.1039/c3ce42063a), 2013-12-12
Supplement: c3ce42063a.pdf [file c3ce42063a.pdf]

## Supplementary Information

# Coordination of $K^+/Ln^{3+}$ to Perhydroxycucurbit[5]uril and The Formation of Supramolecular Self-Assemblies in The Presence of $[PMo_{12}O_{40}]^{3-}$ Anions: Potential Application in Isolation of Light Lanthanides

Bao-Xia Han, Chuan-Zeng Wang, Kai Chen, Xin Xiao, Zhu Tao, Sai-Feng Xue, Yun-Qian Zhang,\* and Qian-Jiang Zhu\*

Key Laboratory of Macrocyclic and Supramolecular Chemistry of Guizhou Province, Guizhou University, Guiyang 550025, China

### Contents:

### EXPERIMENTAL SECTION

**Synthesis:** Chemicals, such as lanthanide nitrates and hydrochloric acid, were of reagent grade and were used without further purification.  $(HO)_{10}Q[5]$  was prepared as reported as literature and used as potassium complex form.<sup>S1</sup> Elemental analyses were carried out on a EURO EA-3000 elemental analyzer. Aqueous HCl ( $1.0 \text{ mol}\cdot\text{L}^{-1}$ ) was used to prepare crystals of  $(HO)_{10}Q[5]-Ln(III)$  in the presence of  $H_3PMo_{12}O_{40}$ . A similar process was used to prepare crystals of related compounds:  $(HO)_{10}Q[5]$  (10 mg, 0.0085 mmol) and  $Ln(NO_3)_3\cdot xH_2O$  (0.034 mmol, 0.148~0.156 g) were dissolved in 1.0 mL  $1.0 \text{ mol}\cdot\text{L}^{-1}$  HCl (solution A),  $H_3PMo_{12}O_{40}$  was dissolved in 1.0 mL  $1.0 \text{ mol}\cdot\text{L}^{-1}$  HCl (solution B), and was then added in the solution A with stirring for the  $Ln-(HO)_{10}Q[5]-[PMo_{12}O_{40}]^{3-}$  systems. X-ray quality crystals were obtained from the solution over a period of 1-5 days. The yellowish-green granular crystals were dependent on the lanthanide ions. Summarizing the preparations according to the three isomorphous groups:  $\{K(H_2O)_2Ln(H_2O)_3Cl@HO_{10}Q[5]\}\cdot [PMo_{12}O_{40}]\cdot 13H_2O$  (**1,2**, Ln = La, Ce) for the first isomorphous group, except compound **3** with a

formula of  $\text{Pr}(\text{H}_2\text{O})_3\text{Cl}@\text{HO}_{10}\text{Q}[5]\cdot[\text{PMo}_{12}\text{O}_{40}]\cdot\text{H}_3\text{O}\cdot 15\text{H}_2\text{O}$ ;  $\{\text{K}(\text{H}_2\text{O})\text{Ln}(\text{H}_2\text{O})_2(\text{Cl}@\text{HO}_{10}\text{Q}[5])\}[\text{PMo}_{12}\text{O}_{40}]\cdot x\text{H}_2\text{O}$  (**4,6,7**, Ln = Nd, Sm, Eu,  $11 \leq x \leq 13$ ) for the second isomorphous group; the compound **8** with a formula of  $\{\text{K}(\text{H}_2\text{O})\text{Gd}(\text{H}_2\text{O})_2\text{Cl}@\text{HO}_{10}\text{Q}[5]\}[\text{PMo}_{12}\text{O}_{40}]\cdot 11\text{H}_2\text{O}$  shows similar coordination to those in the first two isomorphous groups, and supramolecular assembly to those in the third isomorphous group;  $\{\text{K}_2(\text{H}_2\text{O})_2(\text{NO}_3@\text{HO}_{10}\text{Q}[5])\}[\text{PMo}_{12}\text{O}_{40}]\cdot 2\text{H}_3\text{O}\cdot x\text{H}_2\text{O}$  (**9~12**, Ln = Tb, Dy, Ho, Er,  $10 \leq x \leq 11$ ) and  $\{\text{K}_2(\text{H}_2\text{O})_2(\text{H}_2\text{O}@\text{HO}_{10}\text{Q}[5])\}[\text{PMo}_{12}\text{O}_{40}]\cdot \text{H}_3\text{O}\cdot x\text{H}_2\text{O}$  (**13~15**, Ln = Tm, Yb, Lu,  $12 \leq x \leq 13$ ) for the third isomorphous group. Elemental analysis results for the eleven compounds are given in Table 1.

**Table 1. Elemental Analysis Results (%)**

|          |             |              |              |              |              |              |              |
|----------|-------------|--------------|--------------|--------------|--------------|--------------|--------------|
| Results  | <b>1-La</b> | <b>2-Ce</b>  | <b>3-Pr</b>  | <b>4-Nd</b>  | <b>6-Sm</b>  | <b>7-Eu</b>  | <b>8-Gd</b>  |
| C calcd. | 10.75       | 10.75        | 10.81        | 10.74        | 10.95        | 10.95        | 10.93        |
| found    | 10.89       | 10.81        | 10.88        | 10.85        | 11.05        | 11.10        | 11.21        |
| H calcd. | 1.99        | 1.98         | 2.09         | 1.86         | 1.78         | 1.78         | 1.77         |
| found    | 1.91        | 1.90         | 2.00         | 1.77         | 1.67         | 1.71         | 1.69         |
| N calcd. | 8.36        | 8.36         | 8.41         | 8.35         | 8.51         | 8.51         | 8.50         |
| found    | 8.40        | 8.51         | 8.33         | 8.41         | 8.60         | 8.68         | 8.62         |
| Results  | <b>9-Tb</b> | <b>10-Dy</b> | <b>11-Ho</b> | <b>12-Er</b> | <b>13-Tm</b> | <b>14-Yb</b> | <b>15-Lu</b> |
| C calcd. | 11.23       | 11.22        | 11.17        | 11.17        | 11.33        | 11.39        | 11.39        |
| found    | 11.34       | 11.29        | 11.23        | 11.33        | 11.51        | 11.52        | 11.49        |
| H calcd. | 1.89        | 1.95         | 1.94         | 1.94         | 2.00         | 1.94         | 1.94         |
| found    | 1.85        | 2.07         | 2.07         | 2.11         | 2.08         | 2.09         | 2.12         |
| N calcd. | 9.17        | 8.72         | 9.12         | 9.12         | 8.81         | 8.86         | 8.86         |
| found    | 9.27        | 8.79         | 9.21         | 9.16         | 8.90         | 9.00         | 8.97         |

**X-ray crystallography:** A suitable single crystal ( $\sim 0.2 \times 0.2 \times 0.1 \text{ mm}^3$ ) was taken up in paraffin oil and mounted on a Bruker SMART Apex II CCD diffractometer equipped with a graphite-monochromated Mo- $K_\alpha$  ( $\lambda = 0.71073 \text{ \AA}$ ,  $\mu = 0.828 \text{ mm}^{-1}$ ) radiation source operating in the  $\omega$ -scan mode and a nitrogen cold stream ( $-50 \text{ C}$ ). Data were corrected for Lorentz and polarization effects (SAINT),<sup>S2</sup> and semi-empirical absorption corrections based on equivalent reflections were also applied (SADABS).<sup>S2</sup> The structure was elucidated by direct methods and refined by the full-matrix least-squares method on  $F^2$  with the SHELXS-97 and SHELXL-97 program packages, respectively.<sup>S3</sup> All non-hydrogen atoms were refined anisotropically. Carbon-bound hydrogen atoms were introduced at calculated positions, and were treated as riding atoms with an isotropic displacement parameter equal to 1.2 times that of the parent atom. Most of the water molecules in the

compounds were omitted using the SQUEEZE option of the PLATON program, except the coordinated water molecules. The squeezed water molecules are 10, 10, 14, 12, and 9, 9, 9, 10, 10, 9, 11, 11, 10, 8 for compounds **1-4**, **6-15**, respectively. For compounds 9-15, the phosphate moiety of the anion is disordered by symmetry. Analytical expressions for neutral-atom scattering factors were employed, and anomalous dispersion corrections were incorporated. Details of the crystal parameters, data collection conditions, and refinement parameters for the fourteen compounds are summarized in Table 2. In addition, the crystallographic data for the reported structures have been deposited at the Cambridge Crystallographic Data Centre as supplementary publication nos. CCDC-964173 (**1**), 964174 (**2**), 964175 (**3**), 964176 (**4**), 964177 (**6**), 964178 (**7**), 964179 (**8**), 964180 (**9**), 964181 (**10**), 964182 (**11**), 964183 (**12**), 964184 (**13**), 964185(**14**), 964186(**15**). These data can be obtained free of charge via [http://www.ccdc.cam.ac.uk/data\\_request/cif](http://www.ccdc.cam.ac.uk/data_request/cif), or by emailing [data\\_request@ccdc.cam.ac.uk](mailto:data_request@ccdc.cam.ac.uk), or by contacting The Cambridge Crystallographic Data Centre, 12, Union Road, Cambridge CB2 1EZ, UK; fax: +44 1223 336033.

## Reference

- S1 S. Y. Jon, N. Selvapalam, D. H. Oh, J. K. Kang, S. Y. Kim, Y. J. Jeon, J. W. Lee and K. Kim, *J. Am. Chem. Soc.*, 2003, **125**, 10186.  
 S2 Bruker. *SAINTE* and *SADABS*. Bruker AXS Inc., Madison, Wisconsin, USA. 2005.  
 S3 (a) SHELXTL program package, version 5.1; Bruker AXS, Inc.: Madison, WI. (b) G. M. Sheldrick, *Acta Cryst.*, 2008, **A64**, 112.

**Table 2-1.** Crystal Data and Structure Refinement Details for Compounds

| Compound          | <b>1-La</b>                                                                                 | <b>2-Ce</b>                                                                                 | <b>3-Pr</b>                                                                                | <b>4-Nd</b>                                                                                 | <b>6-Sm</b>                                                                                 | <b>7-Eu</b>                                                                                 | <b>8-Gd</b>                                                                                 |
|-------------------|---------------------------------------------------------------------------------------------|---------------------------------------------------------------------------------------------|--------------------------------------------------------------------------------------------|---------------------------------------------------------------------------------------------|---------------------------------------------------------------------------------------------|---------------------------------------------------------------------------------------------|---------------------------------------------------------------------------------------------|
| Empirical formula | C <sub>30</sub> H <sub>66</sub> ClKLa<br>Mo <sub>12</sub> N <sub>20</sub> O <sub>78</sub> P | C <sub>30</sub> H <sub>66</sub> ClKCe<br>Mo <sub>12</sub> N <sub>20</sub> O <sub>78</sub> P | C <sub>30</sub> H <sub>69</sub> ClPr<br>Mo <sub>12</sub> N <sub>20</sub> O <sub>79</sub> P | C <sub>30</sub> H <sub>62</sub> ClKNd<br>Mo <sub>12</sub> N <sub>20</sub> O <sub>76</sub> P | C <sub>30</sub> H <sub>58</sub> ClKSm<br>Mo <sub>12</sub> N <sub>20</sub> O <sub>74</sub> P | C <sub>30</sub> H <sub>58</sub> ClKEu<br>Mo <sub>12</sub> N <sub>20</sub> O <sub>74</sub> P | C <sub>30</sub> H <sub>58</sub> ClKGd<br>Mo <sub>12</sub> N <sub>20</sub> O <sub>74</sub> P |
| Formula weight    | 3350.74                                                                                     | 3351.95                                                                                     | 3332.66                                                                                    | 3320.04                                                                                     | 3290.11                                                                                     | 3291.72                                                                                     | 3297.01                                                                                     |
| Crystal system    | orthorhombic                                                                                | orthorhombic                                                                                | orthorhombic                                                                               | orthorhombic                                                                                | orthorhombic                                                                                | orthorhombic                                                                                | orthorhombic                                                                                |
| Space group       | P c a 21                                                                                    | P c a 21                                                                                    | P c a 21                                                                                   | P n m a                                                                                     | P n m a                                                                                     | P n m a                                                                                     | P n m a                                                                                     |
| a, Å              | 46.552(13)                                                                                  | 46.525(7)                                                                                   | 46.551(5)                                                                                  | 22.648(4)                                                                                   | 22.655(13)                                                                                  | 22.524(4)                                                                                   | 22.485(3)                                                                                   |
| b, Å              | 15.749(4)                                                                                   | 15.707(2)                                                                                   | 15.6964(17)                                                                                | 15.759(3)                                                                                   | 15.874(9)                                                                                   | 15.876(3)                                                                                   | 15.879(2)                                                                                   |
| c, Å              | 22.925(6)                                                                                   | 22.889(3)                                                                                   | 22.913(3)                                                                                  | 23.177(4)                                                                                   | 23.210(13)                                                                                  | 23.193(4)                                                                                   | 23.163(3)                                                                                   |
| α, deg            | 90                                                                                          | 90                                                                                          | 90                                                                                         | 90                                                                                          | 90                                                                                          | 90                                                                                          | 90                                                                                          |
| β, deg            | 90                                                                                          | 90                                                                                          | 90                                                                                         | 90                                                                                          | 90                                                                                          | 90                                                                                          | 90                                                                                          |
| γ, deg            | 90                                                                                          | 90                                                                                          | 90                                                                                         | 90                                                                                          | 90                                                                                          | 90                                                                                          | 90                                                                                          |
| V, Å <sup>3</sup> | 16807(8)                                                                                    | 16726(4)                                                                                    | 16742(3)                                                                                   | 8272(3)                                                                                     | 8347(8)                                                                                     | 8293(3)                                                                                     | 8270(2)                                                                                     |
| Z                 | 8                                                                                           | 8                                                                                           | 8                                                                                          | 4                                                                                           | 4                                                                                           | 4                                                                                           | 4                                                                                           |

|                            |        |        |        |        |        |        |        |
|----------------------------|--------|--------|--------|--------|--------|--------|--------|
| Dcalcd, g cm <sup>-3</sup> | 2.648  | 2.662  | 2.644  | 2.666  | 2.618  | 2.636  | 2.648  |
| T, K                       | 223(2) | 223    | 223    | 223    | 223    | 223    | 223    |
| μ, mm <sup>-1</sup>        | 2.468  | 2.513  | 2.501  | 2.615  | 2.670  | 2.735  | 2.787  |
| Unique reflns              | 29812  | 28977  | 29635  | 7638   | 7638   | 7644   | 7643   |
| Obsd reflns                | 25025  | 24789  | 20924  | 5405   | 5277   | 5120   | 5333   |
| Params                     | 2422   | 2347   | 2167   | 619    | 624    | 624    | 627    |
| Rint                       | 0.0757 | 0.0659 | 0.0966 | 0.0889 | 0.0694 | 0.0695 | 0.0658 |
| R[I > 2σ(I)] <sup>a</sup>  | 0.0490 | 0.0476 | 0.0564 | 0.0831 | 0.0648 | 0.0628 | 0.0587 |
| wR[I > 2σ(I)] <sup>b</sup> | 0.1140 | 0.1070 | 0.1245 | 0.2169 | 0.1748 | 0.1618 | 0.1553 |
| R(all data)                | 0.0602 | 0.0582 | 0.0835 | 0.1094 | 0.0913 | 0.0932 | 0.0834 |
| wR(all data)               | 0.1203 | 0.1130 | 0.1357 | 0.2369 | 0.1914 | 0.1773 | 0.1691 |
| GOF on F <sup>2</sup>      | 1.037  | 1.036  | 1.015  | 1.091  | 1.118  | 1.086  | 1.109  |

$$^a R_1 = \sum ||F_o| - |F_c|| / \sum |F_o|, \quad ^b wR_2 = [\sum w(|F_o|^2 - |F_c|^2) / \sum w(F_o)^2]^{1/2}, \quad \text{where } w = 1 / [\sigma^2(F_o^2) + (aP)^2 + bP]; \quad P = (F_o^2 + 2F_c^2) / 3.$$

**Table 2-2.** Crystal Data and Structure Refinement Details for Compounds

| Compound                   | 9-Tb                                                                                                 | 10-Dy                                                                                                | 11-Ho                                                                                                | 12-Er                                                                                                | 13-Tm                                                                                                | 14-Yb                                                                                                | 15-Lu                                                                                                |
|----------------------------|------------------------------------------------------------------------------------------------------|------------------------------------------------------------------------------------------------------|------------------------------------------------------------------------------------------------------|------------------------------------------------------------------------------------------------------|------------------------------------------------------------------------------------------------------|------------------------------------------------------------------------------------------------------|------------------------------------------------------------------------------------------------------|
| Empirical formula          | C <sub>30</sub> H <sub>60</sub> K <sub>2</sub> Mo <sub>12</sub><br>N <sub>21</sub> O <sub>77</sub> P | C <sub>30</sub> H <sub>62</sub> K <sub>2</sub> Mo <sub>12</sub><br>N <sub>21</sub> O <sub>78</sub> P | C <sub>30</sub> H <sub>62</sub> K <sub>2</sub> Mo <sub>12</sub><br>N <sub>21</sub> O <sub>78</sub> P | C <sub>30</sub> H <sub>62</sub> K <sub>2</sub> Mo <sub>12</sub><br>N <sub>21</sub> O <sub>78</sub> P | C <sub>30</sub> H <sub>63</sub> K <sub>2</sub> Mo <sub>12</sub><br>N <sub>20</sub> O <sub>76</sub> P | C <sub>30</sub> H <sub>61</sub> K <sub>2</sub> Mo <sub>12</sub><br>N <sub>20</sub> O <sub>75</sub> P | C <sub>30</sub> H <sub>61</sub> K <sub>2</sub> Mo <sub>12</sub><br>N <sub>20</sub> O <sub>75</sub> P |
| Formula weight             | 3207.44                                                                                              | 3225.46                                                                                              | 3225.46                                                                                              | 3225.46                                                                                              | 3180.45                                                                                              | 3162.44                                                                                              | 3162.44                                                                                              |
| Crystal system             | monoclinic                                                                                           |
| Space group                | C 2/c                                                                                                |
| a, Å                       | 16.5175(13)                                                                                          | 16.4852(11)                                                                                          | 16.4880(7)                                                                                           | 16.536(2)                                                                                            | 16.5232(15)                                                                                          | 16.622(2)                                                                                            | 16.543(2)                                                                                            |
| b, Å                       | 14.4895(12)                                                                                          | 14.4496(9)                                                                                           | 14.4729(6)                                                                                           | 14.4599(18)                                                                                          | 14.4587(12)                                                                                          | 14.5029(19)                                                                                          | 14.4575(18)                                                                                          |
| c, Å                       | 33.998(3)                                                                                            | 33.998(2)                                                                                            | 33.9442(13)                                                                                          | 33.916(4)                                                                                            | 33.985(3)                                                                                            | 33.980(5)                                                                                            | 33.922(4)                                                                                            |
| α, deg                     | 90                                                                                                   | 90                                                                                                   | 90                                                                                                   | 90                                                                                                   | 90                                                                                                   | 90                                                                                                   | 90                                                                                                   |
| β, deg                     | 99.206(2)                                                                                            | 99.185(2)                                                                                            | 99.196(2)                                                                                            | 99.140(4)                                                                                            | 99.026(3)                                                                                            | 98.924(4)                                                                                            | 99.052(4)                                                                                            |
| γ, deg                     | 90                                                                                                   | 90                                                                                                   | 90                                                                                                   | 90                                                                                                   | 90                                                                                                   | 90                                                                                                   | 90                                                                                                   |
| V, Å <sup>3</sup>          | 8031.9(11)                                                                                           | 7994.6(9)                                                                                            | 7996.0(6)                                                                                            | 8006.5(17)                                                                                           | 8018.6(12)                                                                                           | 8092.2(18)                                                                                           | 8011.8(17)                                                                                           |
| Z                          | 4                                                                                                    | 4                                                                                                    | 4                                                                                                    | 4                                                                                                    | 4                                                                                                    | 4                                                                                                    | 4                                                                                                    |
| Dcalcd, g cm <sup>-3</sup> | 2.652                                                                                                | 2.680                                                                                                | 2.679                                                                                                | 2.676                                                                                                | 2.634                                                                                                | 2.596                                                                                                | 2.622                                                                                                |
| T, K                       | 223(2)                                                                                               | 223(2)                                                                                               | 223(2)                                                                                               | 223(2)                                                                                               | 223(2)                                                                                               | 223(2)                                                                                               | 223(2)                                                                                               |
| μ, mm <sup>-1</sup>        | 2.082                                                                                                | 2.093                                                                                                | 2.093                                                                                                | 2.090                                                                                                | 2.083                                                                                                | 2.062                                                                                                | 2.083                                                                                                |
| Unique reflns              | 6964                                                                                                 | 7159                                                                                                 | 9057                                                                                                 | 7771                                                                                                 | 7012                                                                                                 | 7157                                                                                                 | 6995                                                                                                 |
| Obsd reflns                | 4589                                                                                                 | 5884                                                                                                 | 6856                                                                                                 | 5744                                                                                                 | 4620                                                                                                 | 6115                                                                                                 | 5288                                                                                                 |
| Params                     | 602                                                                                                  | 607                                                                                                  | 611                                                                                                  | 592                                                                                                  | 590                                                                                                  | 606                                                                                                  | 591                                                                                                  |
| Rint                       | 0.0811                                                                                               | 0.0583                                                                                               | 0.0571                                                                                               | 0.0614                                                                                               | 0.0861                                                                                               | 0.0512                                                                                               | 0.0631                                                                                               |

|                        |        |        |        |        |        |        |        |
|------------------------|--------|--------|--------|--------|--------|--------|--------|
| $R[I > 2\sigma(I)]^a$  | 0.0657 | 0.0608 | 0.0557 | 0.0531 | 0.0688 | 0.0489 | 0.0649 |
| $wR[I > 2\sigma(I)]^b$ | 0.1736 | 0.1457 | 0.1388 | 0.1381 | 0.1930 | 0.1439 | 0.1967 |
| R(all data)            | 0.0950 | 0.0719 | 0.0756 | 0.0749 | 0.1025 | 0.0561 | 0.0842 |
| wR(all data)           | 0.1950 | 0.1516 | 0.1497 | 0.1520 | 0.2092 | 0.1482 | 0.2190 |
| GOF on F2              | 1.056  | 1.051  | 1.065  | 1.093  | 1.077  | 1.094  | 1.077  |

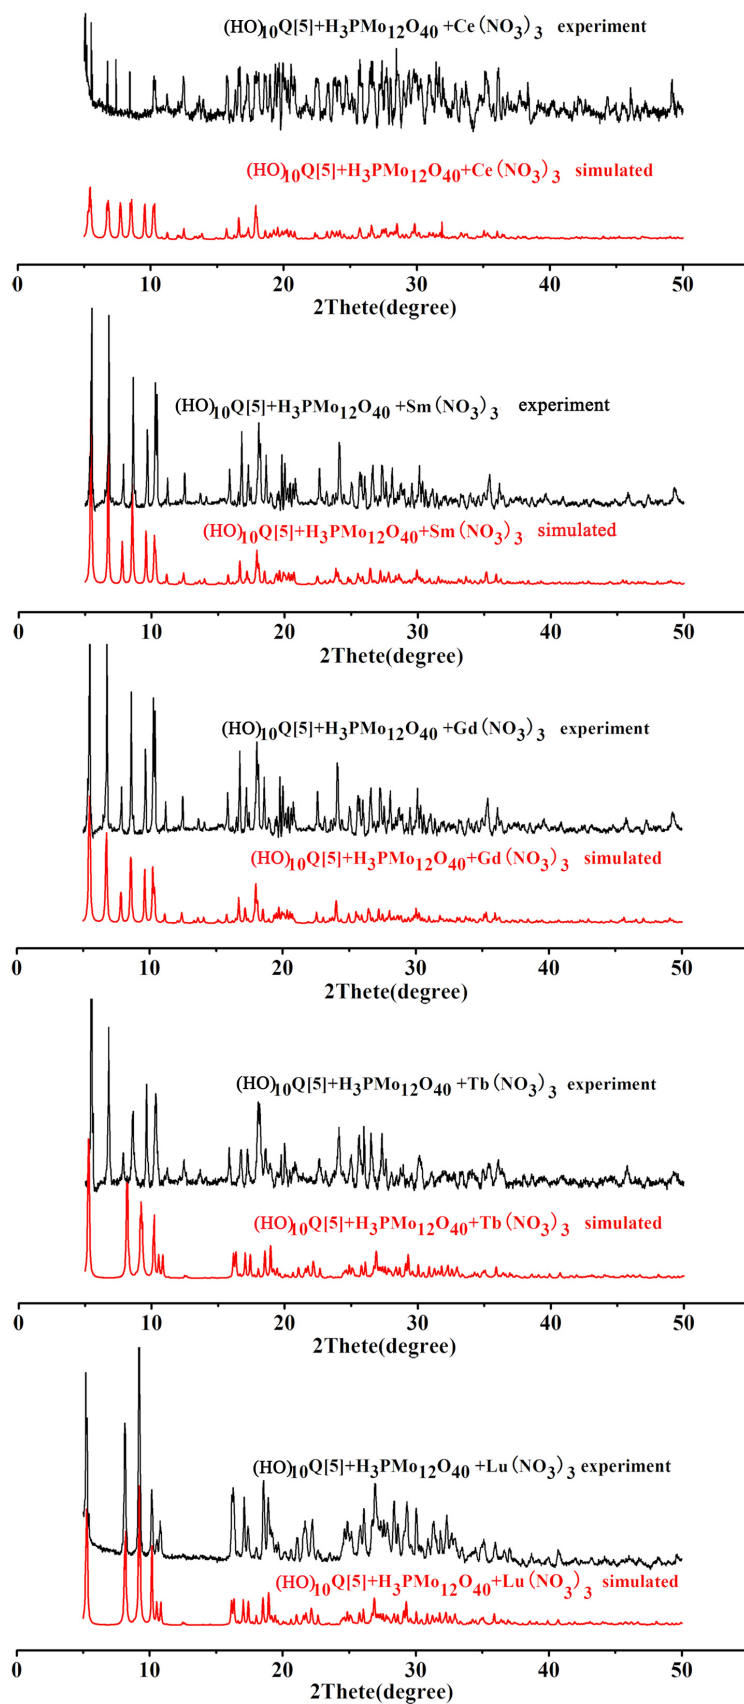

SI-Fig. 1 Powder X-ray diffraction (PXRD) of the representative crystals from the three isomorphous groups respectively

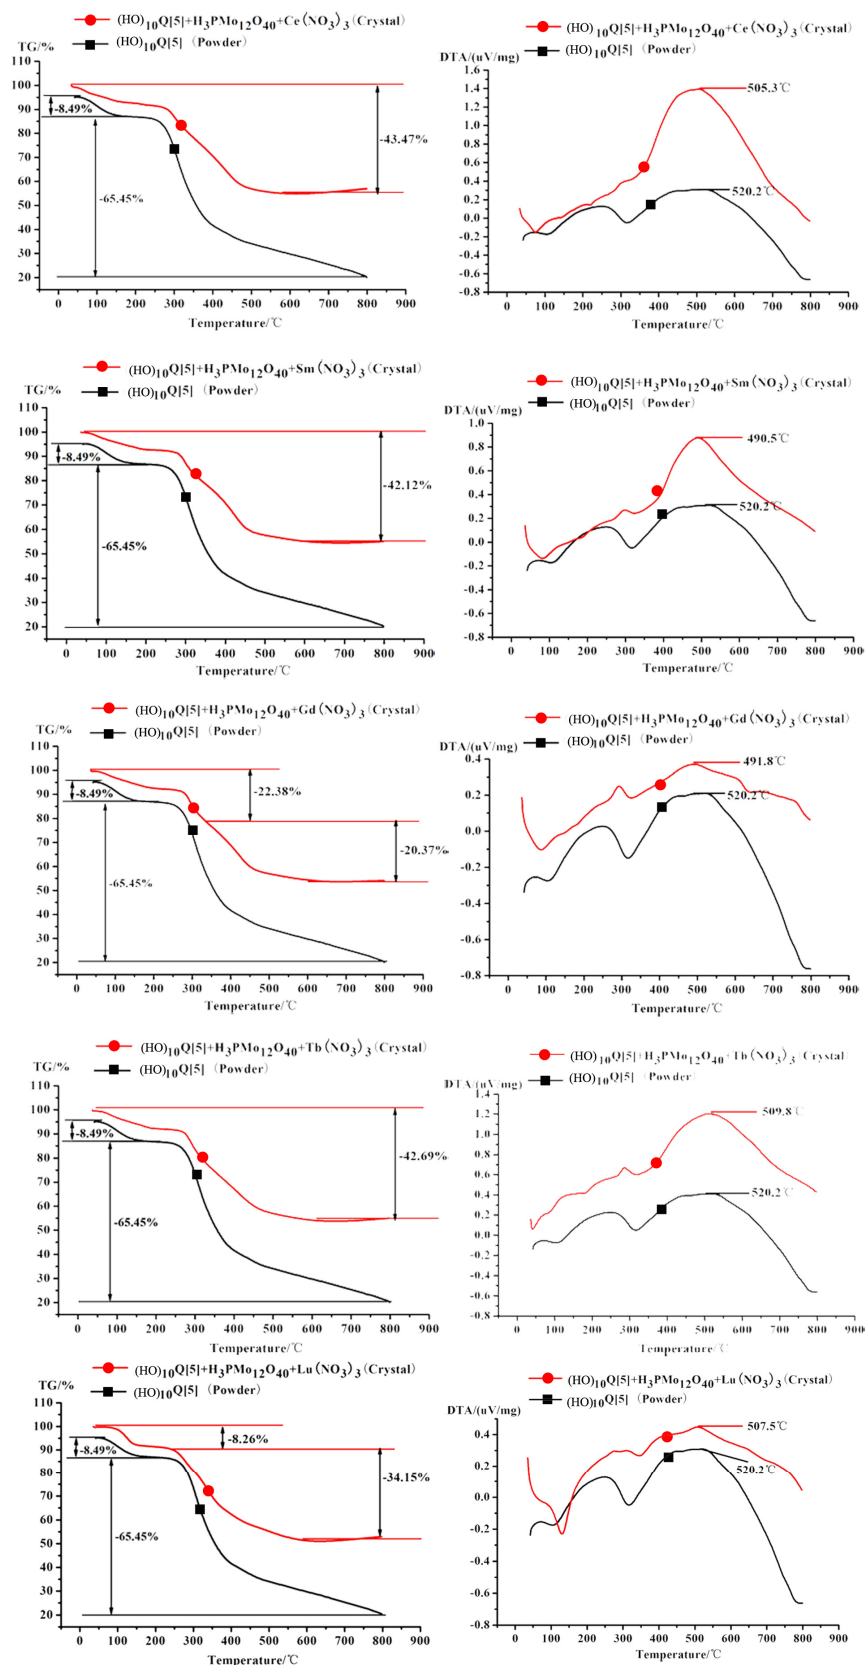

SI-Fig. 2 TG (left) and DSC (right) curves of the representative crystals from the three isomorphous groups with a comparison of (HO)<sub>10</sub>Q[5] in N<sub>2</sub> respectively

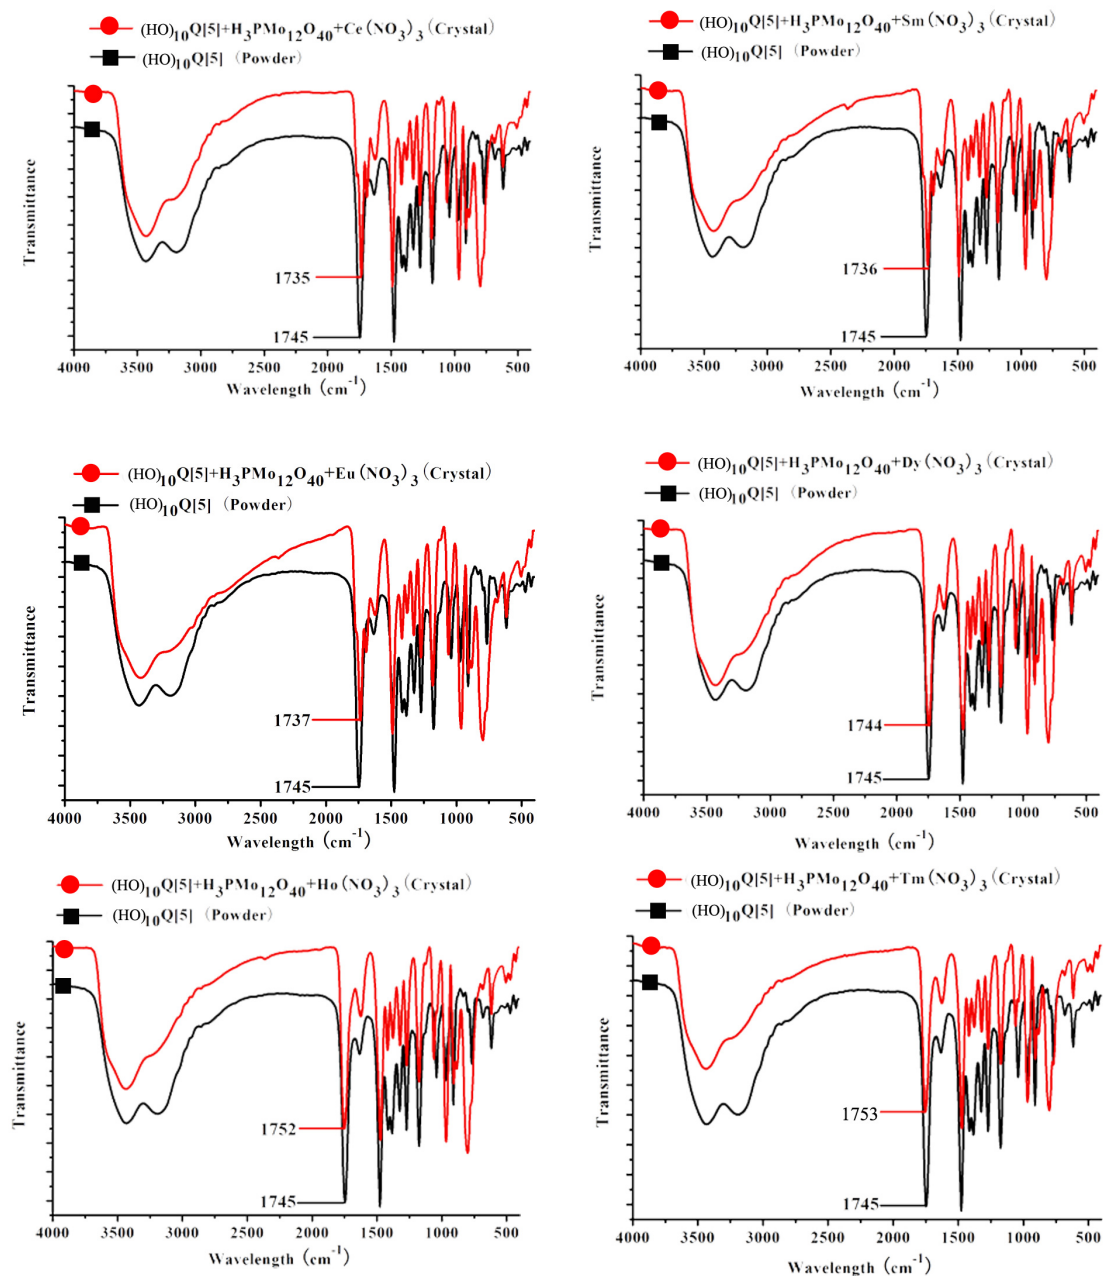

SI-Fig. 3 FT-IR spectra of the representative crystals from the three isomorphous groups with a comparison of (HO)<sub>10</sub>Q[5] powders respectively.



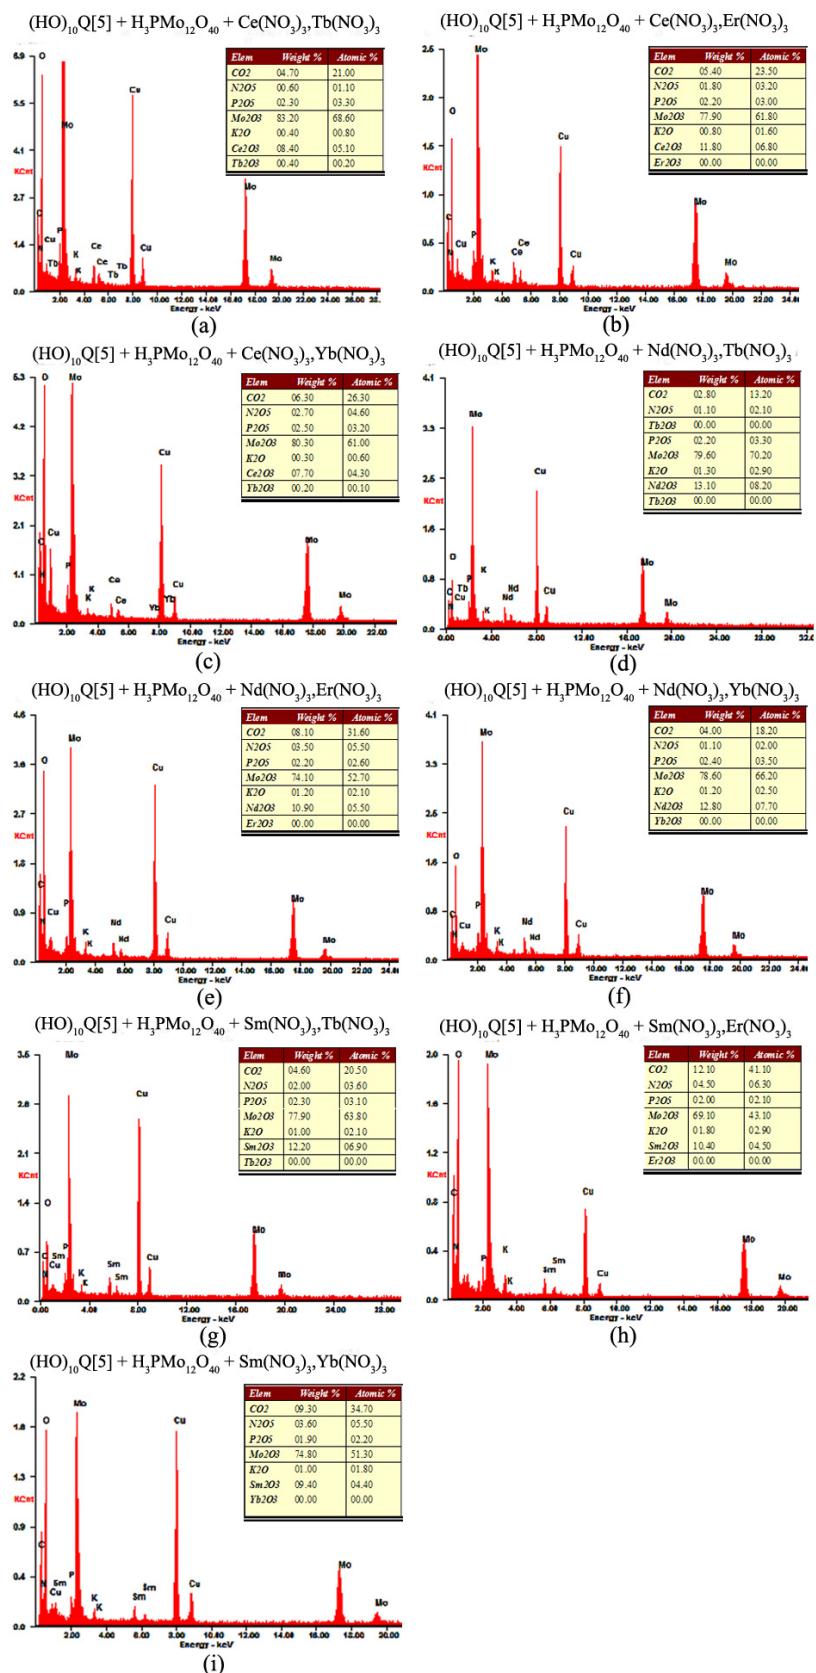

SI-Fig. 4 the electron spectroscopy of  $\text{K}^+(\text{HO})_{10}\text{Q}[5]/[\text{PMo}_{12}\text{O}_{40}]^{3-}$  systems with 1:1 ratios of light : heavy lanthanides

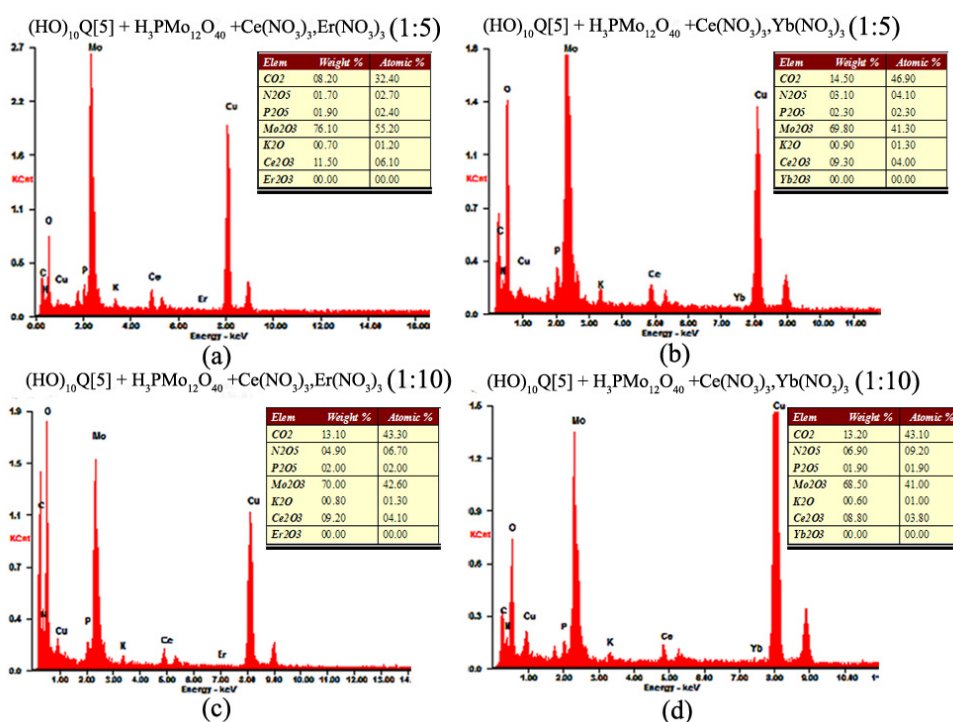

SI-Fig. 5 the electron spectroscopy of  $\text{K}^+(\text{HO})_{10}\text{Q}[5]/[\text{PMo}_{12}\text{O}_{40}]^{3-}$  systems with 1:5 and 1:10 ratios of light : heavy lanthanides

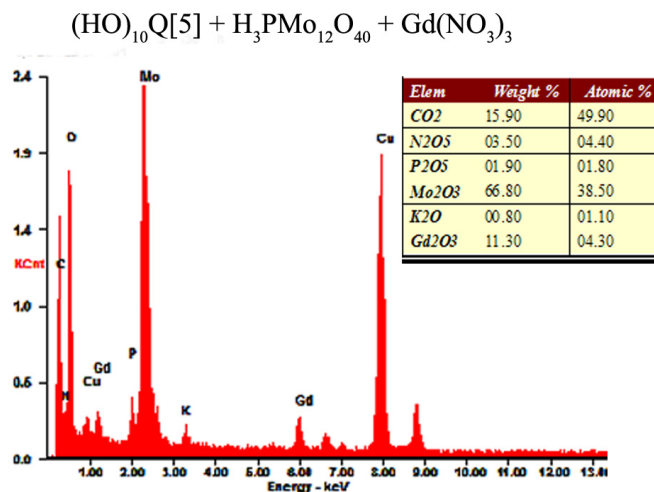

SI-Fig. 6 the electron spectroscopy of the compound 8.
